# Supplementary material
Source: PubMed Central journal article supplement (PMC7777200)
Supplement: pnas.2007694117.sapp.pdf [file pnas.2007694117.sapp.pdf]

1

2 **Supplementary Information for**  
3 **Physical mechanisms of amyloid nucleation on fluid membranes**

4 **Johannes Krausser, Tuomas P. J. Knowles and Andela Šarić**

5 **Andela Šarić.**

6 **E-mail: [a.saric@ucl.ac.uk](mailto:a.saric@ucl.ac.uk)**

7 **This PDF file includes:**

8     Supplementary text

9     Figs. S1 to S10

10    SI References

## 11 Supporting Information Text

12 This document includes additional information and results on the simulations carried out in the present study. In particular it  
13 includes:

- 14 • Overview of interaction in the simulation model
- 15 • Remark on nucleation in solution vs membrane-assisted nucleation
- 16 • Disregarding nucleation in solution
- 17 • Coverage of the membrane surface by *s*-proteins
- 18 • Cluster size distribution of bound *s*-proteins
- 19 • Average area per lipid from Voronoi tessellation
- 20 • Cluster size distribution of nucleated  $\beta$ -proteins
- 21 • Dependence of nucleation rates on  $\beta$ -protein cluster size
- 22 • Details on the free energy profiles
- 23 • Additional data for the comparison with experimental results
- 24 • Lipid solubility in simulations and experiments

## 25 Pair-wise interactions between membrane lipids and proteins

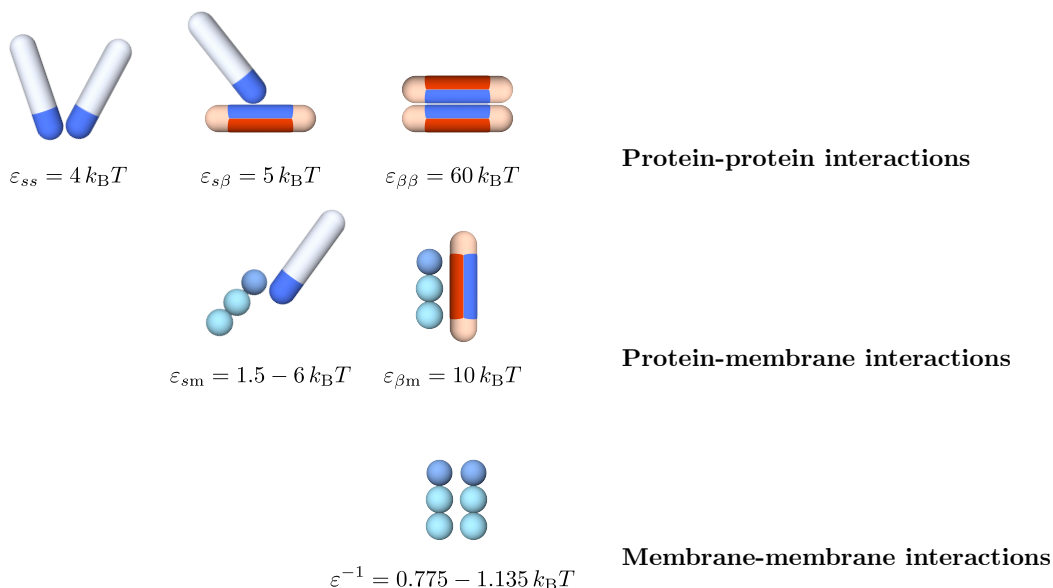

Fig. S1. Overview of interactions in the simulation model: All possible pair interactions between proteins and membranes implemented in the simulation model.

## 26 Coverage of the membrane surface by *s*-proteins

27 Proteins adsorb to the membrane by virtue of their tip interaction with the lipids which is controlled by the value of  $\epsilon_{sm}$ .  
28 Increasing the value of  $\epsilon_{sm}$  leads to a Langmuir-like behaviour of the membrane coverage  $\theta$ , as can be seen in Fig. S2(a). Note  
29 that due to the fact that the membranes are simulated at zero lateral tension, their area decreases when reducing fluidity due  
30 to closer packing of the lipids. The averaging for each value is a configurational and temporal average over 10 realisations and  
31 20 frames separated by 20000 Monte-Carlo time steps each. It is interesting to note that the coverage of the membrane in  
32 the gel regime at  $k_B T/\epsilon = 0.775, 0.815$  is enhanced with respect to the fluid regime. In particular, we can see in Fig. S2(b)  
33 that the surface density of bound monomers is significantly higher for membranes of the lowest fluidities with respect to  
34 highly fluid membranes. This effect, which increases with higher  $\epsilon_{sm}$ -values, stems from the fact that more ordered membrane

35 surfaces promote the binding of isolated monomers in the indented pockets of closely packed lipids. This is accompanied by the  
 36 formation of a brush-like configuration of bound proteins. Figure S2(c) shows the enhancement of bound dimers on the two  
 37 most gel-like membranes at intermediate membrane-protein affinities  $\varepsilon_{sm}$  between  $3.5$  and  $4.5 k_B T$ . This phenomenon also  
 38 translates to the trimer density, as seen in Fig. S2(d).

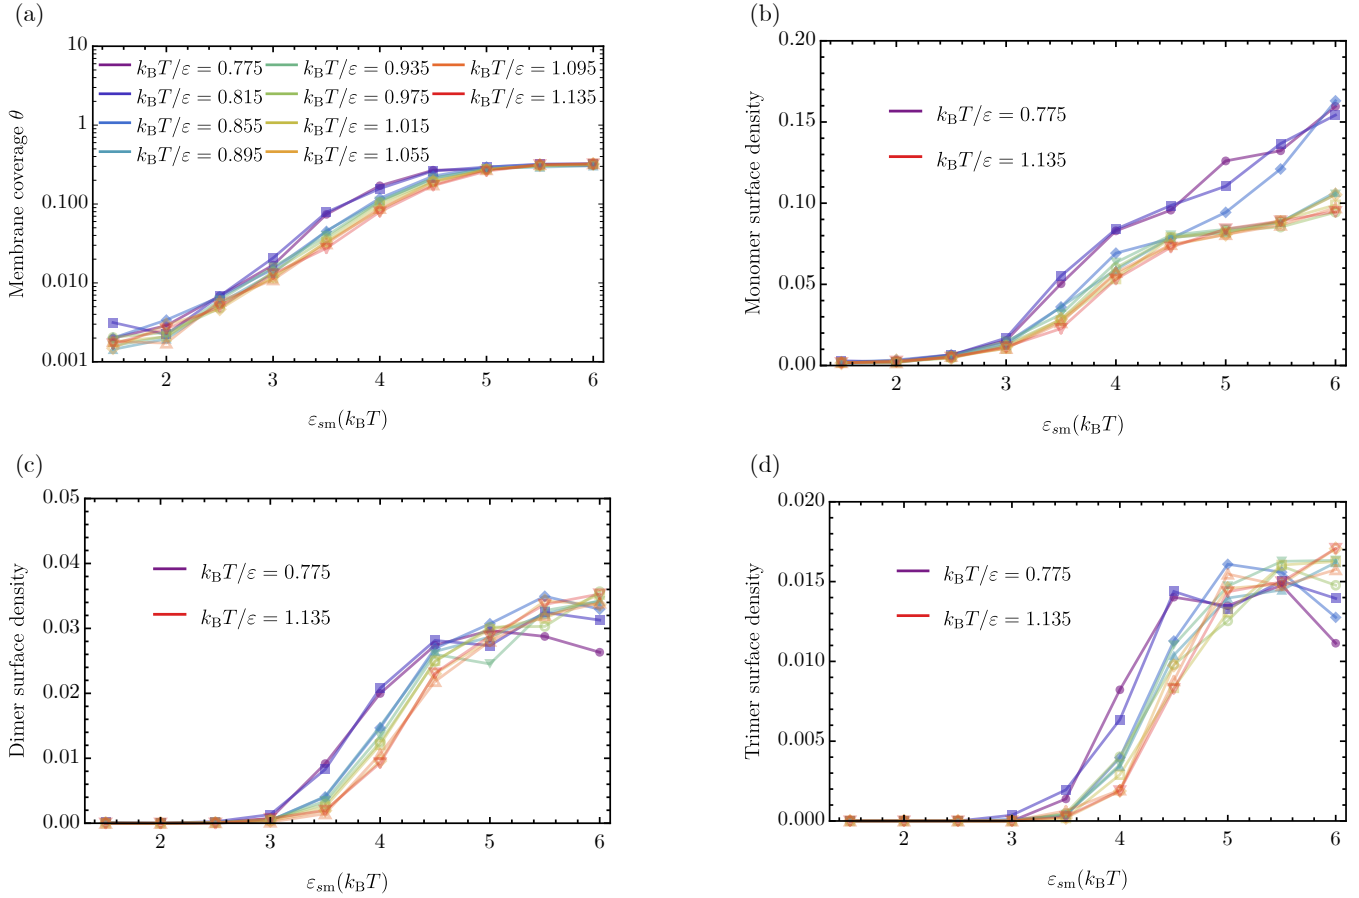

**Fig. S2. Membrane coverage characteristics of soluble proteins as a function of  $\varepsilon_{sm}$  and fluidity:** (a) Average number of adsorbed proteins per unit area on the lipid membrane as a function of the protein-membrane fluidity. Different colours indicate ten different values of fluidity in the range  $k_B T/\varepsilon \in \{0.775, 0.815, \dots, 1.135\}$ . Average number per unit area of oligomers of increasing size: (b) monomers, (c) dimers, and (d) trimers.

39 We can understand the behaviour of the membrane coverage in more detail by considering the average cluster size of bound  
 40 soluble proteins.

### 41 Cluster size distribution of bound *s*-proteins

42 After equilibration of the Langmuir-like binding isotherm we measured the size distribution of oligomers bound to the membrane.  
 43 The criterion for two proteins to be counted in the same oligomer is that they must interact through their tips while being  
 44 bound to the membrane. Note that in this case the oligomer size is obtained before the proteins can switch to their  $\beta$ -sheet  
 45 forming conformation.

46 The average cluster size is plotted in Fig. S3(a). It directly derives from the number of bound oligomers up to size 10, as  
 47 shown in Fig. S2. At the lowest binding affinities the average cluster size can drop below one (only monomers) due to the fact  
 48 some snapshot during temporal averaging contain no bound proteins. Furthermore, the average cluster size rises more steeply  
 49 with  $\varepsilon_{sm}$  for less fluid membranes. Above  $\varepsilon_{sm} = 4.5 k_B T$  the average cluster size for the two least fluid membranes saturates  
 50 and even drop as  $\varepsilon_{sm}$  is increased further. This can be explained by the fact that the abundance of bound proteins further  
 51 drives the lipids in to a close-packed state. There proteins bind strongly in the resulting dents between the close-packed lipid  
 52 heads which hinders the formation of oligomers and leads to an excess in bound monomers.

53 Effectively, this results in an opposite scaling of the average cluster size with the fluidity above and below the threshold  
 54  $\varepsilon_{sm} = 4.5 k_B T$ , which signals a binding regime of strong protein binding. This scaling is shown Fig. S2(b).

### 55 Distribution of area per lipid

56 In order to shed light on the influence of bound protein proteins we computed the distribution of areas per lipids as a function  
 57 of both the membrane-protein affinity  $\varepsilon_{sm}$  and the membrane fluidity. The area per lipid distribution was obtained by Voronoi

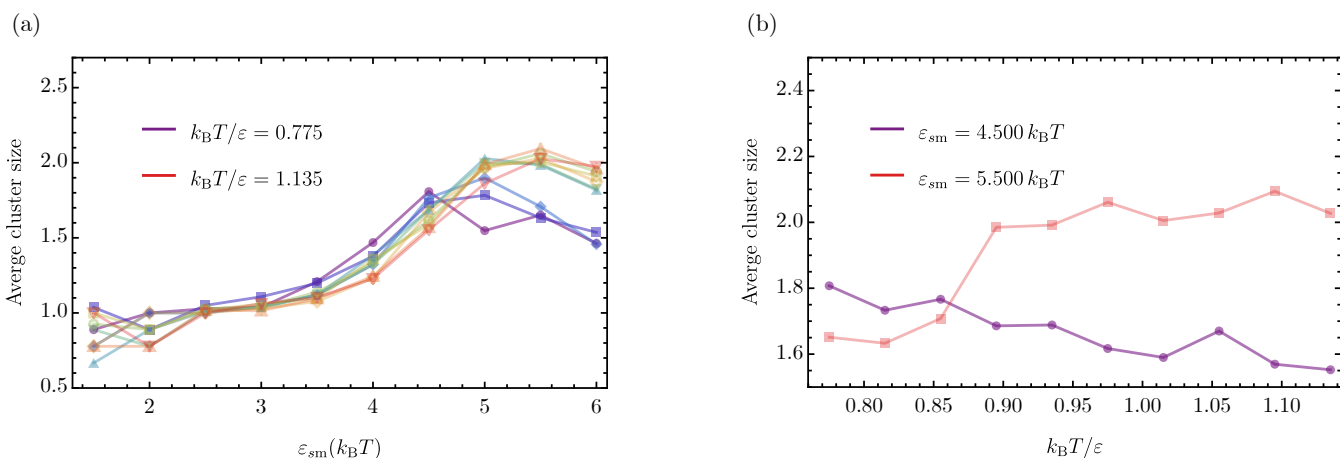

**Fig. S3. Average cluster size of bound protein oligomers** (a) Average cluster size of soluble protein oligomers bound to the lipid bilayer. Different colours indicate ten different values of fluidity  $k_B T/\epsilon \in \{0.775, 0.815, \dots, 1.135\}$ . (b) Slice through (a) at the constant protein-membrane affinities  $\epsilon_{sm} = 4.5 k_B T$  and  $\epsilon_{sm} = 5.5 k_B T$  showing an increase (decrease) of the average oligomer size with growing membrane fluidity.

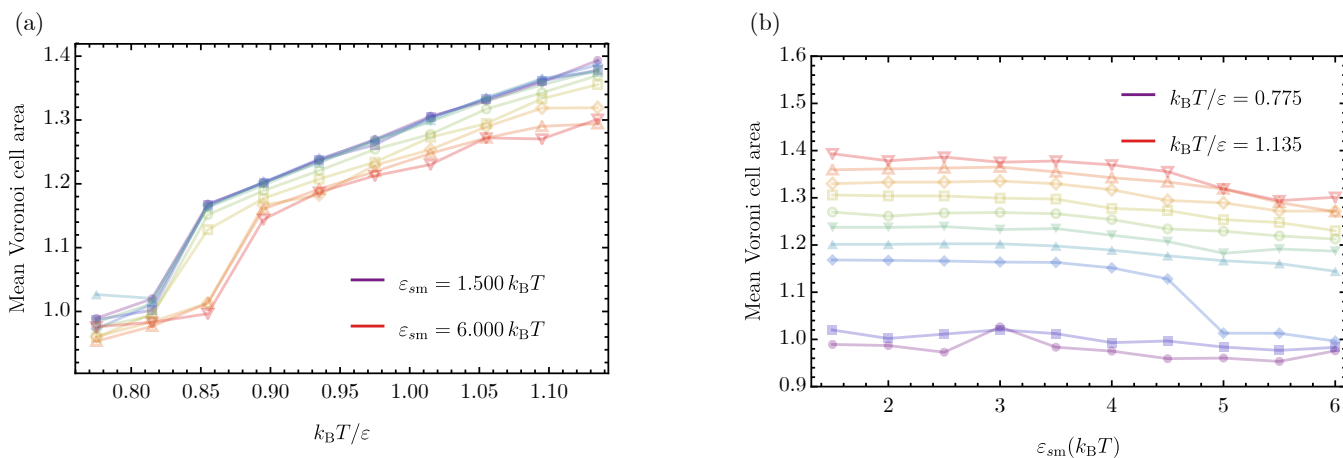

**Fig. S4. Average area per lipid:** Average area per lipid as a function of (a) membrane fluidity and (b) membrane-protein affinity obtained via Voronoi tessellation.

tessellation.

Figure S4 shows the average area per lipid as a function of the fluidity. Firstly, we directly can see the signature of the gel-to-fluid membrane phase transition as a jump in the average area per lipid as  $k_B T/\epsilon$  is increased, i.e. as the strength of the hydrophobic lipid tail attraction is decreased. In addition we observe that the three cases with the highest membrane-protein affinities exhibit a shifted phase boundary between gel and fluid. The adsorption of proteins delays the gel-fluid transition towards higher  $k_B T/\epsilon$ -values. Or put differently, the adsorption of  $s$ -proteins to the membrane can induce a fluid-to-gel transition.

#### Cluster size distribution of bound $\beta$ -proteins

In addition to the case of soluble proteins, we also recorded the oligomer size distribution of converted  $\beta$ -proteins. Simulations were run until 20 proteins have converted to their  $\beta$ -state, then the cluster size distribution was recorded. Here, the criterion for being counted in the same cluster is that two proteins have to be interacting through their side patches in the  $\beta$ -conformation. The results can be seen in Fig. S5.

The average cluster size of  $\beta$ -prone proteins depends on both the membrane-protein affinity  $\epsilon_{sm}$  and the membrane fluidity. High membrane-protein affinities entail a high membrane coverage, which in turn leads to the quick elongation of nucleated  $\beta$ -proteins. This manifests itself in an average cluster size of 20 for the lowest fluidity above affinities of  $\epsilon_{sm} = 4.5 k_B T$ .

We can observe that increasing fluidity tends to reduce the average  $\beta$ -cluster size due to the increased tendency towards producing mixed lipid-protein clusters.

#### Dependence of the nucleation rates on the cluster size

As discussed in the main text, the nucleation rates in Fig. 3 are determined by the time step where the first  $\beta$ -prone dimer is formed. In Fig. S6 we report the dependence of the nucleation rate of clusters on the size of the cluster. The main

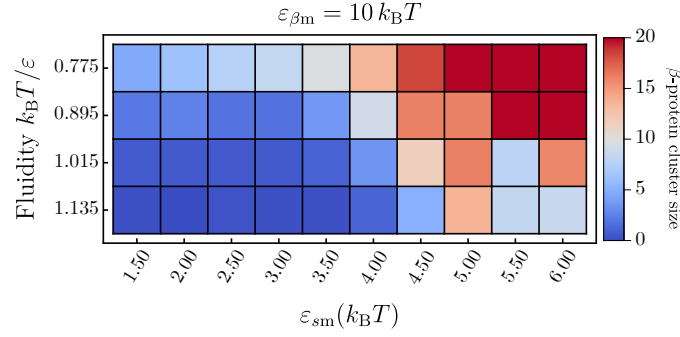

**Fig. S5. Average size of  $\beta$ -protein clusters:** Average cluster size distribution once 20  $\beta$ -prone proteins were formed.

78 conclusion we can draw from this analysis is that the formation of higher order  $\beta$ -clusters is suppressed in the regime of small  
 79 membrane-protein affinities and high fluidities. This can be explained by the consideration that fast formation of higher order  
 80  $\beta$ -cluster on the one hand requires a local environment enriched in bound proteins, which is not provided at low  $\epsilon_{sm}$ -values and  
 81 on the other hand can be inhibited by the absorption of  $\beta$ -proteins into the membrane core facilitated at high fluidities.

## 82 Details on the free energy profiles

83 The potentials of mean force (PMF) for both protein species were obtained using Umbrella simulations in which one isolated  
 84 protein was brought into interaction with the lipid bilayer by lowering the protein in a stepwise fashion from solution into the  
 85 the centre of the lipid membrane.

86 Therefore, these simulations inherently cannot account for cooperative effects between proteins but will only reflect the  
 87 influence of the membrane on the conversion probability of a single isolated protein.

88 From the umbrella simulation we obtained the two potentials of mean force for the soluble and  $\beta$ -like protein, denoted by  
 89  $\mathcal{V}_s = \mathcal{V}_s(z, \epsilon, \epsilon_{sm})$  and  $\mathcal{V}_\beta = \mathcal{V}_\beta(z, \epsilon, \epsilon_{\beta m})$ , respectively. Here, the variable  $z$  designates the centre-of-mass separation between  
 90 the membrane and the protein.

91 A single protein is placed at a sufficient distance from the membrane to be out of interaction range. Then the protein  
 92 is inserted into the membrane using a biasing potential, as illustrated in Fig. 4. Subsequently, the weighted histogram  
 93 analysis method (1) is used to compute  $\mathcal{V}(z)$ . The resulting PMFs reflect the corresponding free energy of binding in the  
 94 protein-membrane system.

95 We distinguish the free energy profiles for the  $s$ - and  $\beta$ -states of the protein that are denoted by  $\mathcal{V}_s(z)$  and  $\mathcal{V}_\beta(z)$ , respectively.  
 96 The minimum position  $z_{\min,s}$  reflects the average equilibrium binding position of the protein along the membrane normal.

97 **Variation with protein-membrane affinity.** As the respective affinities are increased, the depth of both the PMFs of the soluble  
 98 and  $\beta$ -like proteins increase reflecting the stronger binding of the protein to the membrane, as can be seen in Fig. S7(a) and  
 99 (b) for  $k_B T / \epsilon = 0.895$ . In addition to this, we observe that the minimum of  $\mathcal{V}_s$  shifts also in position to lower values of the  
 100 centre-of-mass separation, which is not the case for  $\mathcal{V}_\beta$ . This results from the model assumption that soluble proteins can also  
 101 interact with the two hydrophobic lipid tails.

102 At the same time the density profile of the membrane lipids is not affected by increasing the affinity. From this we can  
 103 conclude that the soluble protein insert further into the lipid bilayer as its affinity to the membrane is increased, which is a  
 104 result of the specific lipid interaction profile we have chosen.

105 **Variation with membrane fluidity.** Varying the membrane fluidity, the soluble PMF reacts differently. This situation is plotted  
 106 in Fig. S7 (c). At the lowest fluidity  $k_B T / \epsilon = 0.775$ , the protein experiences a strong repulsive branch of the PMF, while  
 107 being bound in a relatively narrow well on top of the lipid membrane. In the more fluid phases the resulting PMF is markedly  
 108 softer. We observe both a decrease in the depth of the PMF and and shift to lower values of  $\Delta z_{cm}$ . However, in contrast  
 109 to the constant fluidity case, now the density profile of the membrane is changed as well which results from the thinning of  
 110 the membrane as its phase state changes from gel to fluid. The average  $z$  position of the lipid head in the top leaf of the  
 111 membrane decreases from  $2.4\sigma \pm 0.35\sigma$  to  $1.92\sigma \pm 0.64\sigma$  indicating that the membrane thins and at the same time the lipid  
 112 head experiences higher fluctuations in  $z$ . Going across the gel-fluid transition, the minima of the soluble PMF shifts by more  
 113 than  $\sigma$  which indicates that the shift in the PMF position is a combination of the thinning of the membrane and a higher  
 114 mobility along the membrane normal due to higher fluidity.

115 A slightly different situation arises for the  $\beta$ -like protein as shown in Fig. S7(d). If the membrane is in its gel phase, the  
 116 PMF  $\mathcal{V}_\beta(z)$  exhibits a barrier since the  $\beta$ -proteins do not directly bind to the hydrophilic lipid heads. As the fluidity of the  
 117 membrane is increased, this barrier vanishes and the resulting value of the PMF minimum decreases with higher fluidities.

118 In summary, the membrane fluidity in our simulation model has a direct effect on the characteristics of the membrane-protein  
 119 interaction. As can be seen in Fig. S8(a) both the membrane fluidity and the protein-membrane interaction have a significant  
 120 effect on the position of the PMF minima for the soluble protein. The resulting affinity is shown in Fig. S8(b). We see that at

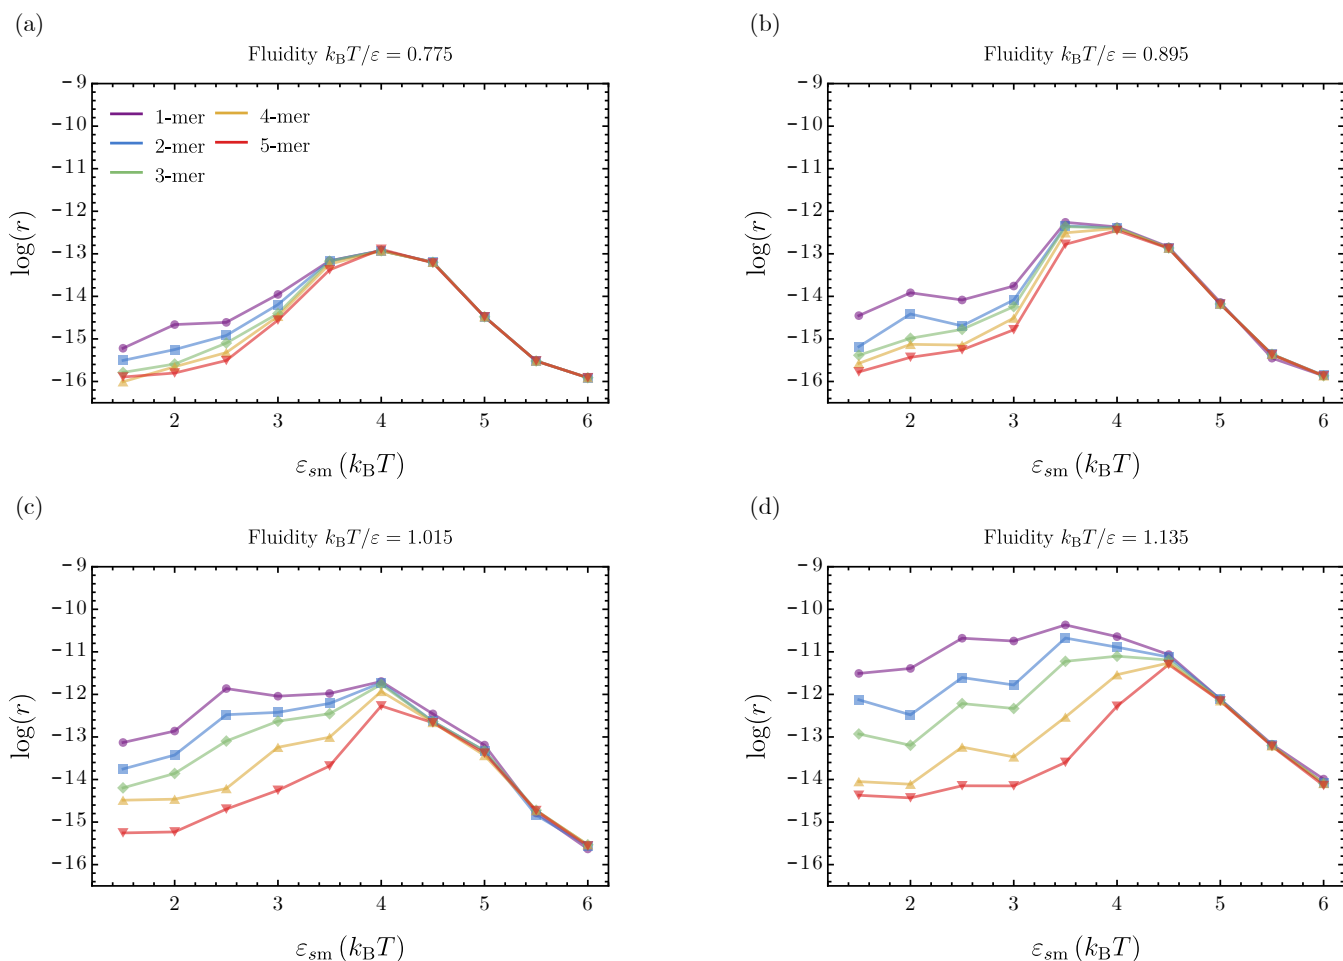

**Fig. S6. Nucleation rate for different cluster sizes.** The four panels show the nucleation rates as a function of  $\varepsilon_{sm}$  for the four different fluidities studied in this work. Each panel reports the rate for forming a  $\beta$ -monomer up to a  $\beta$ -pentamer as the membrane fluidity  $k_B T/\varepsilon$  and the membrane-protein affinity  $\varepsilon_{sm}$  are varied.

high affinities, the protein is more strongly bound at low fluidities than at high fluidities. This results from the closer packing of the lipid head, and bound protein can arrange in the resulting lattice-like surface of the membrane surface maximising its binding energy.

### Comparison of simulation results with experimental data

In order to allow for a quantitative comparison to available experimental data we consider the variation of amyloid nucleation rates as a function of the average area per lipid. Specifically, we consider the relative increase in rates and area per lipid between different fluid membranes with respect to a gel membrane given by  $r_{fluid}/r_{gel}$  and  $A_{fluid}/A_{gel}$ , respectively.

Plotting  $r_{fluid}/r_{gel}$  against  $A_{fluid}/A_{gel}$  for the two cases discussed in the main text (Fig. 3), we can observe a markedly different scaling. If  $\varepsilon_{\beta m} = 0 k_B T$ ,  $r_{fluid}/r_{gel}$  shows a very weak dependence on the increase in area per lipid, which is caused by increasing membrane fluidity. In contrast to this the interacting case  $\varepsilon_{\beta m} = 0 k_B T$  exhibits a significantly higher variation with the increase in area per lipid caused by the increased exposure of hydrophobic content through membrane defects as fluidity grows. To quantify the different scalings we fitted the two data sets which provides us with two exponents  $\lambda$  for the fitting function of the form

$$r_{fluid}/r_{gel} \propto (A_{fluid}/A_{gel})^\lambda. \quad [1]$$

The fits result in  $\lambda = 0.42$  for the case  $\varepsilon_{\beta m} = 0 k_B T$  and  $\lambda = 14.2$  for the case  $\varepsilon_{\beta m} = 10 k_B T$ , as illustrated in Fig. S9.

### Lipid solubility in simulations and experiments

Experiments in Ref. (2) have shown that decreases the length of the acyl chain of saturated lipids from  $(16:0)_2$  (DPPS) to  $(14:0)_2$  (DMPS) and  $(12:0)_2$  (DLPS) increases to solubility (or free energy of transfer)  $\Delta G$  from approximately  $-55 kJ mol^{-1}$  to  $-48 kJ mol^{-1}$  and  $-41 kJ mol^{-1}$ , respectively. Under the experimental condition in this Reference, the  $(16:0)_2$  lipid vesicles are in the gel phase, whereas the other two are in the fluid phase.

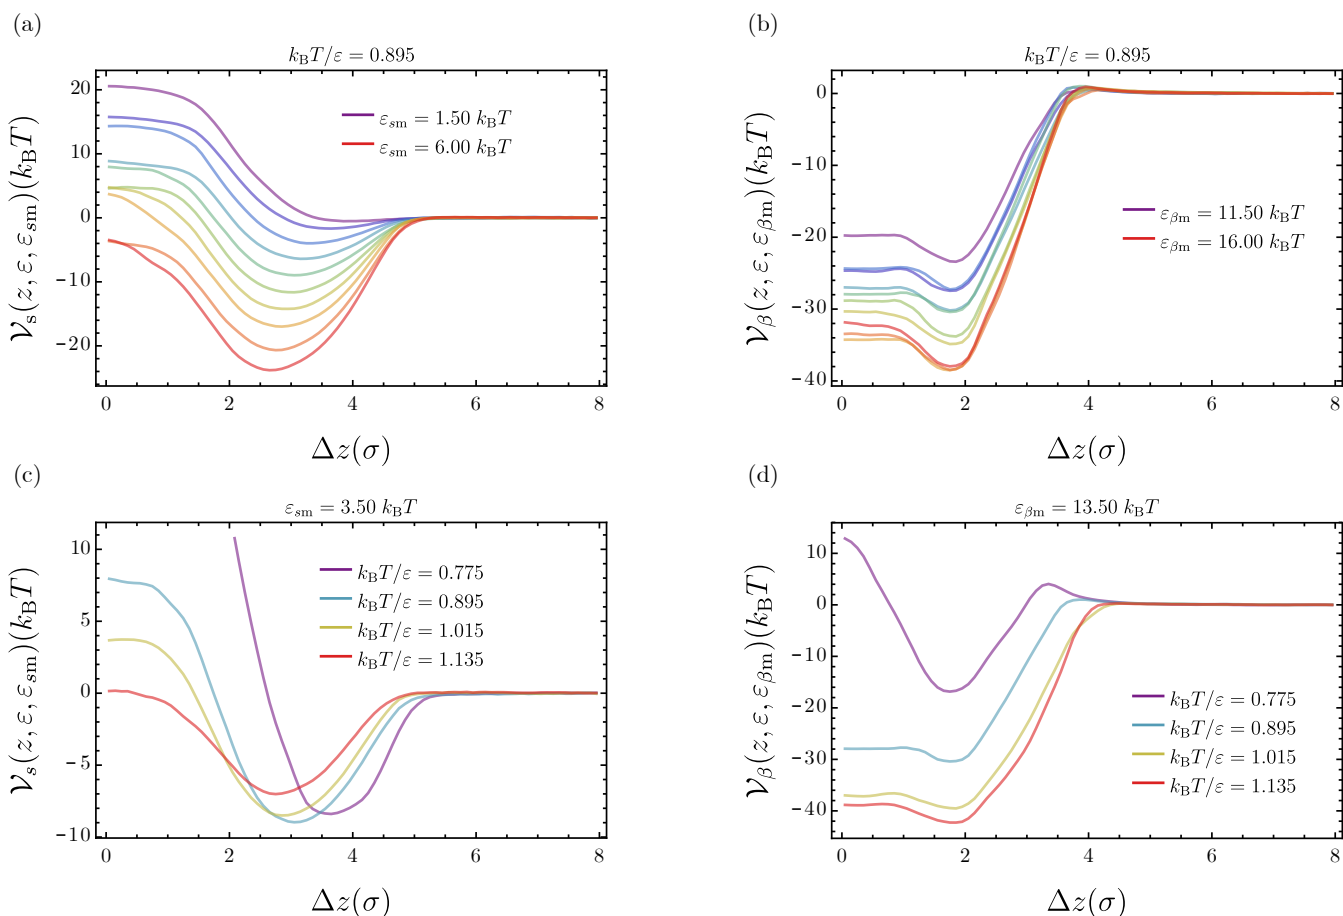

**Fig. S7. Free energy profiles of the soluble and  $\beta$ -like protein.** The four panels show a selection of free energy profiles: **(a)**, **(b)** at fixed fluidity and **(c)**, **(d)** at fixed affinity. **(a)** Free energy profile of the soluble protein at fixed fluidity  $k_B T/\epsilon = 0.895$  and varying affinities  $\epsilon_{sm}$ . **(b)** Free energy profile of the  $\beta$ -like protein at fixed fluidity  $k_B T/\epsilon = 0.895$  and varying affinities  $\epsilon_{\beta m}$ . **(c)** Free energy profile of the soluble protein at fixed affinity  $\epsilon_{sm} = 3.50 k_B T$  and varying fluidity. **(d)** Free energy profile of the  $\beta$ -like protein at fixed affinity  $\epsilon_{\beta m} = 13.50 k_B T$  and varying fluidity.

134 The corresponding values of the lipid free energy of transfer in our simulations exhibit the same trend when reducing the  
 135 interaction strengths between the lipid tails (i.e. going from the gel to the lipid phase). However, a precise match of the  
 136 numerical values of the lipid solubility cannot be achieved from such a general lipid membrane model.

137 For the different fluidities  $k_B T/\epsilon = 0.775, 0.895, 1.015$  and  $1.135$  the value of the lipid solubility in simulations is approximately  
 138  $\Delta G = -45 kJ mol^{-1}, -35 kJ mol^{-1}, -25 kJ mol^{-1}$  and  $-15 kJ mol^{-1}$ , respectively.

### 139 Remark on nucleation in solution vs membrane-assisted nucleation

140 We have confirmed that for a conversion free energy barrier of  $\Delta F_{s \rightarrow \beta} = 20 k_B T$  nucleation in solution never occurs within our  
 141 simulation time ( $4 * 10^7$  Monte-Carlo time steps). This is the case using the protein number concentration of 0.002, a protein  
 142 self-interaction  $\epsilon_{ss} = 4 k_B T$  and a switching attempt frequency of 100, the same conditions used in the simulations in the  
 143 presence of the lipid bilayer. Under these condition, with a  $\beta$ -membrane interaction  $\epsilon_{\beta m} = 20 k_B T$  nucleation occurs on average  
 144 after  $1.2 * 10^5$  time steps in the presence of a fluid membrane ( $k_B T/\epsilon = 1.015$ ) in intermediate the protein-membrane affinity  
 145 regime at  $\epsilon_{sm} = 3.5 k_B T$ . Hence, membrane-assisted nucleation in our model can be significantly faster than homogeneous  
 146 nucleation, as reported experimentally.

147 Even though our model is simple, the large number of lipids and the need for a substantial nucleation statistics prevents us  
 148 from exploring slow nucleation mechanisms, which is needed to be able to understand the requirements for fast nucleation. To  
 149 be able explore the slow nucleation mechanisms realised in the case of a gel-like membrane and at both high and low values of  
 150 protein-membrane affinity  $\epsilon_{sm}$  we reduced the conversion free energy barrier to  $\Delta F_{s \rightarrow \beta} = 10 k_B T$  in all our simulations. At  
 151 the same time the  $\beta$ -membrane interaction was scaled proportionally to  $\epsilon_{\beta m} = 10 k_B T$ . This does not change the nucleation  
 152 mechanism, but renders it substantially faster to make it computationally accessible. In addition a condition was imposed that  
 153  $s \rightarrow \beta$  conversion can occur only in the presence of a lipid molecule, to prevent possible nucleation in solution that can occur  
 154 for this lowered barrier but does not occur for  $\Delta F_{s \rightarrow \beta} = 20 k_B T$  and  $\epsilon_{\beta m} = 10 k_B T$  and does not occur in experiments (see also  
 155 the section "Disregarding nucleation in solution" below).

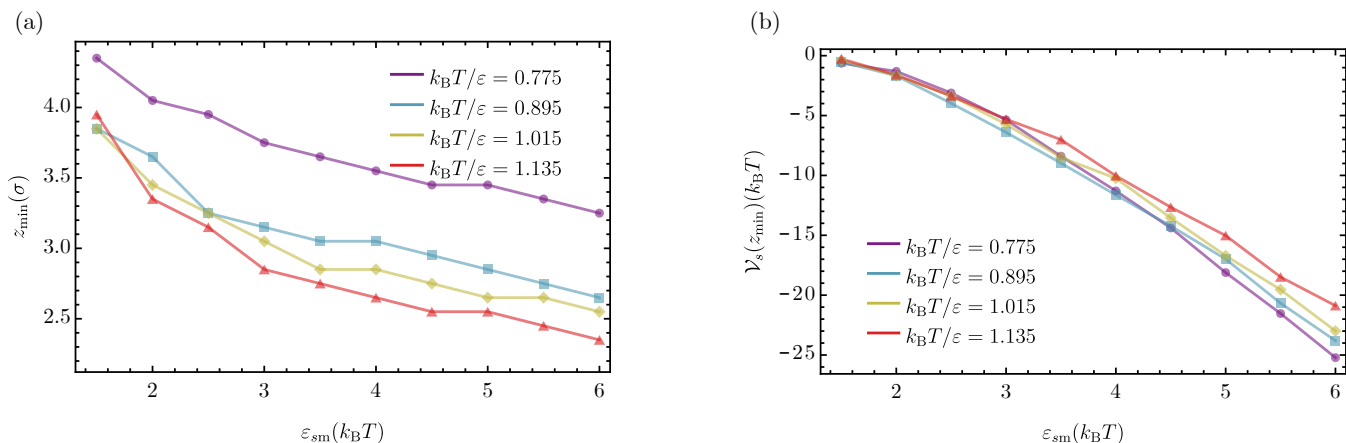

**Fig. S8. Minima of the soluble potential of mean force:** (a) Position of the minima of  $V_s(z)$  as a function of  $\epsilon_{sm}$ . Different colours indicate the four different membrane fluidities discussed in this work. (b) Depth of the free energy profile  $V_s(z)$  at the minimum position  $z_{\min}$  as a function of membrane fluidity and membrane-protein affinity.

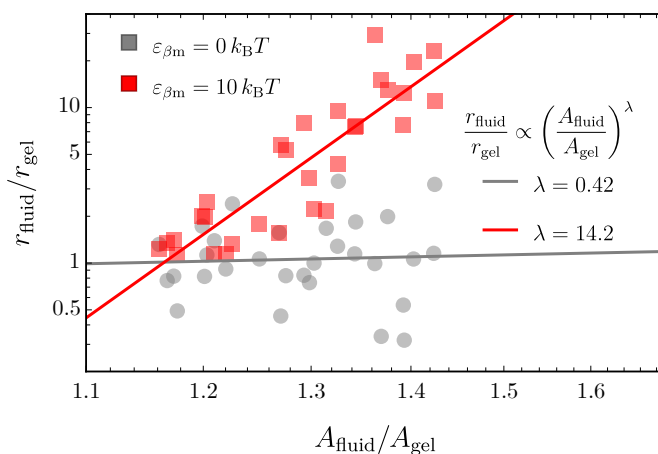

**Fig. S9. Increase in nucleation rates as a function of area per lipid:** The relative increase in nucleation rates is plotted against the relative increase in area per lipid for the two cases with and without interactions between the lipid tails in the  $\beta$ -prone proteins. In addition, fits to the data points are shown to retrieve the scaling exponent  $\lambda$ .

156 Imposing this scheme allows us to efficiently sample the full range of parameters in our simulation. In particular, the full  
 157 range of protein-membrane affinities  $\epsilon_{sm}$  up to saturation and the complete gel-to-fluid transition of the lipid bilayer.

### 158 Disregarding nucleation in solution

159 Our focus on surface-driven nucleation is justified by the strong evidence that the nucleation of  $\alpha$ -synuclein in the presence of  
 160 lipid bilayers, which is the physiologically relevant regime, is initiated at the membrane surface and not in solution (3, 4).  
 161 Three equally strong pieces of evidence to that end are as follows:

- 162 1. In Ref. (4), showed that amyloid nucleation strongly depends on the lipid concentration when vesicles are present in  
 163 the system. Since such a system is necessarily above CMC, and any added lipid amount goes to the bilayer instead  
 164 of remaining in the solution, which shows that the nucleation depends on the concentration of bilayer surface, not the  
 165 concentration of lipids in solution.
- 166 2. Using global fitting of experimental kinetic data to an analytical model, which accounts for the key microscopic steps in  
 167 the aggregation process, Galvagnion et al. (4) determined that the primary nucleation of  $\alpha$ -synuclein in the presence  
 168 of lipid vesicles depends very weakly on the concentration of free monomers in solution. Therefore, free monomers in  
 169 solution are not directly involved in the rate-determining step in nucleation, and the nucleation does not occur in solution.  
 170 The same has been shown for A $\beta$  amyloid aggregation as well by Habchi et al. (5).
- 171 3. TEM and AFM images have shown fibrils growing between the vesicles (2), as well as from the surface of vesicles (6). If  
 172 the fibrils were to nucleate in solution it would be very unlikely to acquire such an organisation on the membrane.

173 Because of this we prevented nucleation in solution and allowed  $s \rightarrow \beta$  conformational conversion only in the presence of a  
 174 lipid.



175 At higher fluidities and higher solubilities, occasional escape of lipids from the bilayer structure becomes more prevalent.  
 176 Adding proteins in the soluble state has the effect of stabilising the bilayer structure and reduce lipid escape from the membrane.  
 177 In the case of very high membrane fluidities, lipid escape however still may happen and interactions between lipids tails  
 178 and proteins in solution could drive nucleation events. However, we have not recorded these events in our simulations since  
 179 we intended to isolate the effect of the assembled bilayer on the nucleation kinetics and hence count only the nucleation  
 180 effects that occur below the distance of  $8\sigma$  above the equilibrated membrane centre. To check that our approximation is  
 181 correct, we measured the rate when events on single free lipids in solution are counted (they are events which do not occur at  
 182  $\Delta F_{s \rightarrow \beta} = 20 k_B T$  but may appear at  $\Delta F_{s \rightarrow \beta} = 10 k_B T$ ) and compared it to the rate when only nucleation on the membrane  
 183 surface is considered. This is shown in Fig. S10 for the highest fluidity  $k_B T / \varepsilon = 1.135$  and it is evident that this only leads  
 184 to a minimal difference in the overall nucleation kinetics. At lower fluidities no difference in nucleation rates appears in our  
 185 simulations.

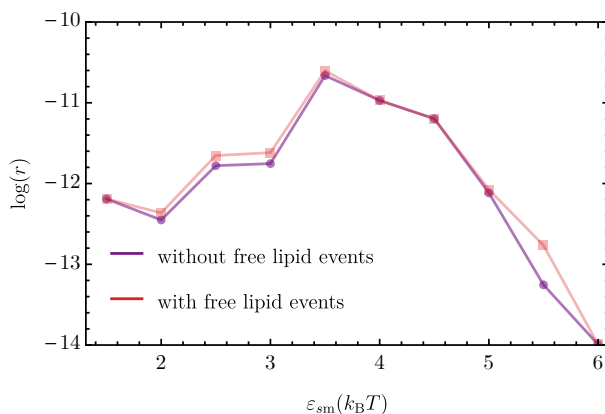

**Fig. S10. Contribution of free lipid nucleation events** Nucleation rates of dimers were measured at different membrane-protein affinities at  $k_B T / \varepsilon = 1.135$ . The curve in purple contains only events on the membrane surface and the red curve also contains events on free lipids in solution.

## 186 References

- 187 1. J Kästner, Umbrella sampling. *Wiley Interdiscip. Rev. Comput. Mol. Sci.* **1**, 932–942 (2011).
- 188 2. C Galvagnion, et al., Chemical properties of lipids strongly affect the kinetics of the membrane-induced aggregation of  
 189  $\alpha$ -synuclein. *Proc. Natl. Acad. Sci.* **113**, 7065–7070 (2016).
- 190 3. G Fusco, et al., Direct observation of the three regions in  $\alpha$ -synuclein that determine its membrane-bound behaviour. *Nat.*  
 191 *Commun.* **5**, 1–8 (2014).
- 192 4. C Galvagnion, et al., Lipid vesicles trigger  $\alpha$ -synuclein aggregation by stimulating primary nucleation. *Nat. Chem. Biol.* **11**,  
 193 229–234 (2015).
- 194 5. J Habchi, et al., Cholesterol catalyses A $\beta$ 42 aggregation through a heterogeneous nucleation pathway in the presence of  
 195 lipid membranes. *Nat. Chem.* **10**, 673–683 (2018).
- 196 6. JH Lee, et al., Radiating Amyloid Fibril Formation on the Surface of Lipid Membranes through Unit-Assembly of Oligomeric  
 197 Species of  $\alpha$ -Synuclein. *PLoS ONE* (2012).
